# Supplementary material for: Efficient photocatalytic CO2 reduction mediated by transitional metal borides: metal site-dependent activity and selectivity
Source: Royal Society of Chemistry journal article supplement (doi:10.1039/d0ta07072f), 2020-01-01
Supplement: d0ta07072f1.pdf [file d0ta07072f1.pdf]

**Efficient photocatalytic CO<sub>2</sub> reduction mediated by transitional metal borides: metal site dependent activity and selectivity**

Li Shi <sup>a#</sup>, Pei Wang <sup>b#</sup>, Qi Wang <sup>a,c</sup>, Xiaohui Ren <sup>a,c</sup>, Fumihiko Ichihara <sup>a,c</sup>, Wei Zhou <sup>e</sup>, Hongwei Zhang <sup>f</sup>, Yasuo Izumi <sup>f</sup>, Ben Cao <sup>b</sup>, Shengyao Wang <sup>a,b</sup>, Hao Chen <sup>b\*</sup>, Jinhua Ye <sup>a,c,d\*</sup>

<sup>a</sup> International Center for Materials Nanoarchitectonics (WPI-MANA), National Institute for Materials Science (NIMS), 1-1 Namiki, Tsukuba, Ibaraki, 305-0044, Japan.

<sup>b</sup> College of Science, Huazhong Agricultural University, Wuhan, 430070, P. R. China.

<sup>c</sup> Graduate School of Chemical Sciences and Engineering, Hokkaido University, Sapporo, 060-0814, Japan.

<sup>d</sup> TU-NIMS Joint Research Center, School of Materials Science and Engineering, Tianjin University, 92 Weijin Road, Nankai District, Tianjin 300072, P. R. China.

<sup>e</sup> Department of Applied Physics, Tianjin Key Laboratory of Low Dimensional Materials Physics and Preparing Technology, Faculty of Science, Tianjin University, Tianjin 300072, P. R. China.

<sup>f</sup> Department of Chemistry, Graduate School of Science, Chiba University, Yayoi 1-33, Inage-ku, Chiba 263-8522, Japan.

# These authors contributed equally to this work.

E-mail: Jinhua.YE@nims.go.jp; hchenhao@mail.hzau.edu.cn

## Computational details

Spin-polarized and a standard dipole correction calculations were conducted with the Vienna Ab-initio Simulation Package (VASP 5.4.4)<sup>[1],[2]</sup>. The electron exchange and correlation were depicted with the generalized gradient approximation (GGA) utilizing Perdew–Burke–Ernzerhof (PBE) functional<sup>[3]</sup>. The electron-ion interaction was depicted by the projector augmented-wave formalism (PAW)<sup>[4],[5]</sup>. The plane wave cut-off energy is 400 eV, and the electronic self-consistent convergence is  $10^{-6}$  eV. Geometries were converged to a residual force smaller than 0.02 eV/Å. The dipole correction was applied in the Z direction. The Brillouin zone was integrated by a  $9 \times 9 \times 9$  and  $5 \times 5 \times 1$  Monkhorst–Pack grid for bulk and slab models, respectively. The CO<sub>2</sub>, CO and H<sub>2</sub> gas molecular, and liquid H<sub>2</sub>O were calculated based on the previous work<sup>[6]</sup>.

The optimized bulk Ni<sub>3</sub>B, Co<sub>3</sub>B, and Fe<sub>2</sub>B lattice parameters were in good agreement with the experimental value as shown in Table S2<sup>[7-9]</sup>. The Ni<sub>3</sub>B(010), Co<sub>3</sub>B(010), and Fe<sub>2</sub>B(010) surface are modeled by a  $\sqrt{3} \times \sqrt{3}$  supercell, and 9 layers with a total 48, 48, and 36 atoms respectively. The vacuum thickness was set at 15 Å to neglect the interaction between the adjacent slabs. The bottom 6 layers were fixed in its bulk position, while the top 3 layers were relaxed in the calculations. The Ni<sub>3</sub>B(010) surface could be terminated either by Ni or NiB layer, and its model was set by a periodic slab with several trilayers achieved from the bulk Ni<sub>3</sub>B structure, and each trilayer was composed of three atomic monolayers, namely NiB-Ni-Ni. The case is the same for Co<sub>3</sub>B, while for Fe<sub>2</sub>B, the trilayer consists of B-Fe-Fe monolayers. Therefore, there were three kinds of (010) surfaces, namely as M-M-MB, M-MB-M, MB-M-M. The MB-M-M (B-M-M for Fe<sub>2</sub>B) was chosen to represent (010) surface, due to it has the lowest surface energy and similar structures for the Ni<sub>3</sub>B(010), Co<sub>3</sub>B(010) and Fe<sub>2</sub>B(010) surfaces, as shown in FigureS6. And the structure of intermediate along the reaction path was shown in Figure S7.

The surface energy  $\gamma$  is described as, 
$$\gamma = \frac{[(E_{slab} - NE_{bulk}) - \frac{1}{2}(E_{slab}^{unrel} - NE_{bulk})]}{A}$$
, where  $E_{slab}$ ,  $E_{slab}^{unrel}$  and  $E_{bulk}$  stand for the total energies of the free relaxed upper three layers, the unrelaxed surface, and the

optimized unit cell bulk, respectively. A refers to the surface area, and N is the number of bulk units on the surface.

The free energy was obtained from the equation  $G = E_{\text{ele}} + E_{\text{vib}} + E_t + E_r - TS$  as using the vaspkit (1.00 version) tool<sup>[10]</sup>, where  $E_{\text{ele}}$ ,  $E_t$ ,  $E_r$ , and  $E_{\text{vib}}$  are the electronic, translational, rotational and vibrational energies, respectively. And S is the entropy, T was set to room temperature (298.15 K). where the frequency below  $50 \text{ cm}^{-1}$  was set to  $50 \text{ cm}^{-1}$ .

The computational hydrogen electrode (CHE,  $\text{H}^+ + \text{e}^- \rightarrow 1/2 \text{H}_2$ ,  $\text{PH} = 0$ ) model has been used for the free energy of adsorbates<sup>[11]</sup>, which involves proton-electron transfers as  $\Delta G(U) = \Delta G_0 + neU$ , where n refers to the transferred number of protons-electrons, and U stands for the potential versus the reversible hydrogen electrode (RHE),  $\Delta G_0$  is the free energy at  $U=0$ . The reaction barrier was also the limiting potential ( $U_L$ ) is calculated by:  $U_L = -\Delta G_0/e$ .

The optimized bulk Ni lattice parameters is  $3.521 \text{ \AA}$ , and it is consistent with the experimental value ( $3.524 \text{ \AA}$ ). The Ni(111) surface is modeled by a  $\sqrt{3} \times \sqrt{3}$  supercell, and 5 layers with a total of 45 atoms, with  $15 \text{ \AA}$  vacuum thickness. The bottom 2 layers were fixed in its bulk position, while the top 3 layers were relaxed in the calculations. The Brillouin zone was integrated by an  $11 \times 11 \times 11$  and  $5 \times 5 \times 1$  Monkhorst–Pack grid for bulk and slab models, respectively. The adsorption energy of CO was calculated by reference to  $\text{CO}_2$ ,  $\text{H}_2$ , and  $\text{H}_2\text{O}$  molecular, which is  $\Delta G = G_{\text{co/surf}} - G_{\text{surf}} - G_{\text{CO}_2} - G_{\text{H}_2} + G_{\text{H}_2\text{O}}$ . Here  $G_{\text{co/surf}}$ ,  $G_{\text{surf}}$ ,  $G_{\text{CO}_2}$ ,  $G_{\text{H}_2}$ , and  $G_{\text{H}_2\text{O}}$  represents the free energies of CO adsorbed system, surface,  $\text{CO}_2$  molecular,  $\text{H}_2$  molecular, and liquid  $\text{H}_2\text{O}$  molecular, respectively. This was also the same energy of  $\Delta G(\text{CO}^* + \text{H}_2\text{O}(l))$  in reaction path.

The optimized bulk NiO lattice parameters of  $4.180 \text{ \AA}$  were in good agreement with the experimental value ( $4.168 \text{ \AA}$ ). Since GGA was not able to correctly describe the electronic structure of  $\text{Ni}^{4+}$ , we adopted the GGA+U approximation with the Dudarev “+U” term with a U-J value of 8.0 eV for the d electrons of Ni atoms<sup>[12]</sup>.

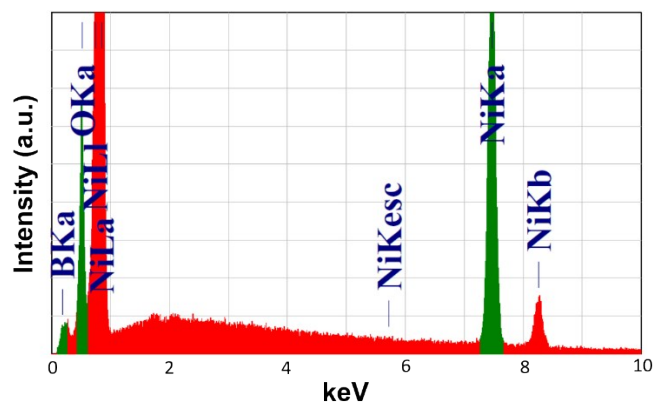

Figure S1. EDX spectrum of  $\text{Ni}_3\text{B}$ .

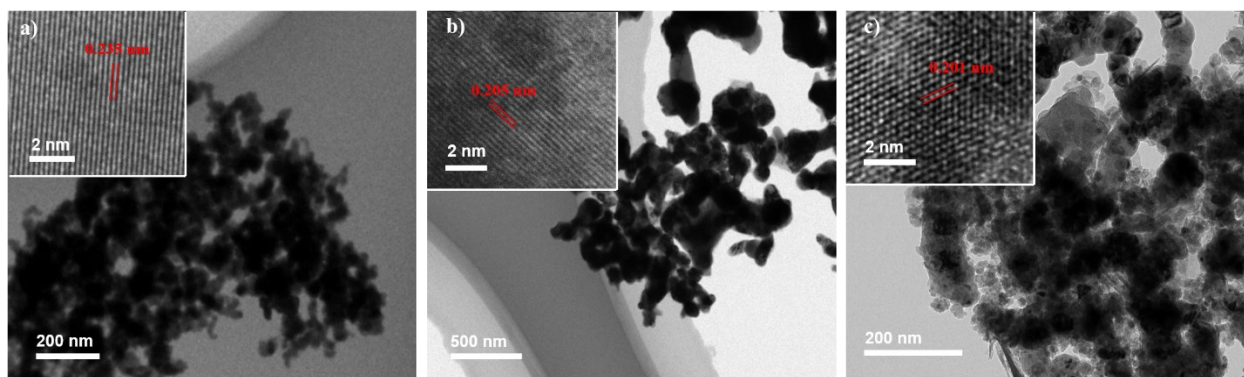

Figure S2. TEM and HRTEM images of (a)  $\text{Ni}_3\text{B}$ , (b)  $\text{Co}_3\text{B}$  and (c)  $\text{Fe}_2\text{B}$ .

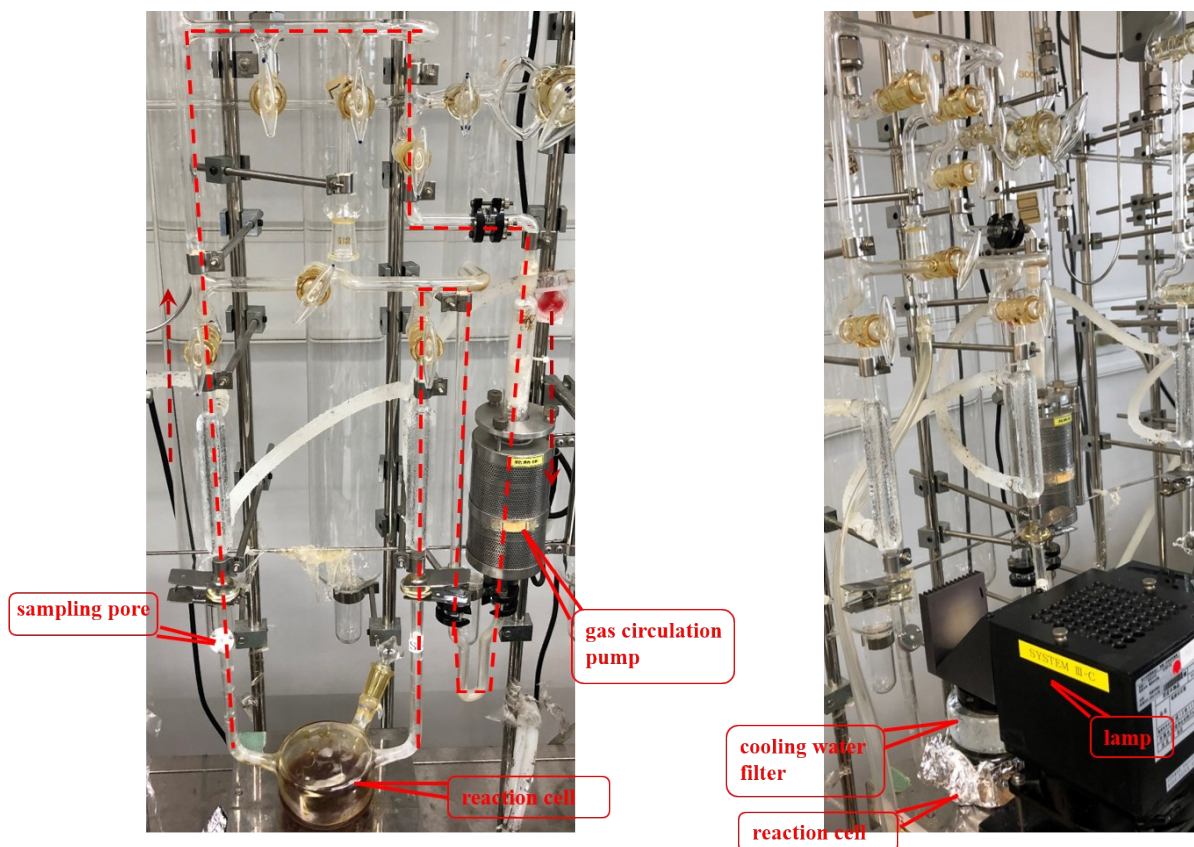

Figure S3. Experimental setup of liquid-solid reaction mode for photocatalytic CO<sub>2</sub> reduction.

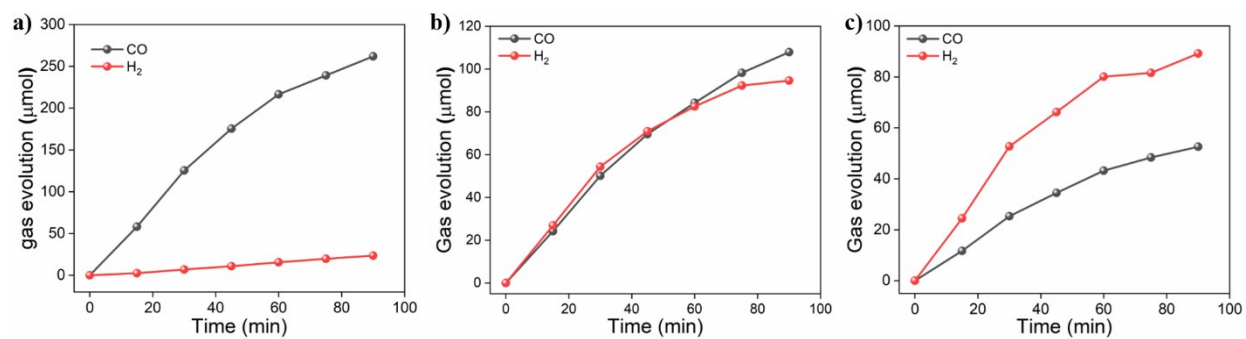

Figure S4. Time-dependent CO and H<sub>2</sub> evolution over (a) Ni<sub>3</sub>B/[Ru], (b) Co<sub>3</sub>B/[Ru] and (c) Fe<sub>2</sub>B/[Ru].

Table S1. Comparison of photocatalytic CO<sub>2</sub> activities over different cocatalysts in the [Ru] photosensitized systems.

| Cocatalysts                                        | Photosensitizer/<br>sacrificial agent | Major product<br>evolution rate<br>( $\mu\text{mol h}^{-1}$ ) | Selectivity | AQY                 | References                                          |
|----------------------------------------------------|---------------------------------------|---------------------------------------------------------------|-------------|---------------------|-----------------------------------------------------|
| Ni <sub>3</sub> B                                  | [Ru]/TEOA                             | CO: 157.7                                                     | 93.0%       | 4.5% at<br>420 nm   | This work                                           |
| N-doped carbon@NiCo <sub>2</sub> O <sub>4</sub>    | [Ru]/TEOA                             | CO: 26.2                                                      | 88.6%       | 1.07% at<br>420 nm  | Energy Environ. Sci., 2018, 11,<br>306-310.         |
| single-atom Co on graphene                         | [Ru]/TEOA                             | CO: 77.9                                                      | 79.4%       | /                   | Adv. Mater., 2018, 30,<br>1704624.                  |
| Nickel Metal–Organic<br>Framework Monolayers       | [Ru]/TEOA                             | CO: 12.5                                                      | 97.8%       | 2.2% at<br>420 nm   | Angew. Chem. Int. Ed., 2018,<br>57, 16811-16815.    |
| Cobalt Imidazolate Metal–<br>Organic Frameworks    | [Ru]/TEOA                             | CO: 83.6                                                      | 58.3%       | 1.48% at<br>420 nm  | Angew. Chem. Int. Ed., 2014,<br>53, 1034-1038.      |
| Co <sub>3</sub> O <sub>4</sub> Hexagonal Platelets | [Ru]/TEOA                             | CO: 35.2                                                      | 77.1%       | 0.069% at<br>450 nm | Adv. Mater., 2016, 28, 6485-<br>6490.               |
| Co-ZIF-67                                          | [Ru]/TEOA                             | CO: 29.6                                                      | 66.6%       | 1.55% at<br>420 nm  | Appl. Catal. B: Environ, 2017,<br>209, 476-482.     |
| CoSn(OH) <sub>6</sub>                              | [Ru]/TEOA                             | CO: 19.3                                                      | 86.46%      | 1.16% at<br>450 nm  | ACS Sustainable Chem. Eng.,<br>2017, 6, 781-786.    |
| MnCo <sub>2</sub> O <sub>4</sub>                   | [Ru]/TEOA                             | CO: 27.0                                                      | 77.1%       | /                   | ACS Appl. Mater. Interfaces,<br>2015, 7, 4327-4335. |

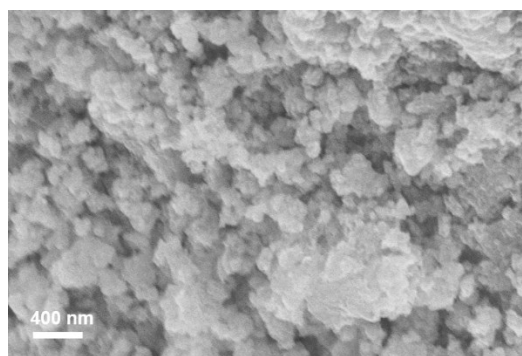

Figure S5. SEM image of Ni<sub>3</sub>B after photocatalytic CO<sub>2</sub> reduction reaction.

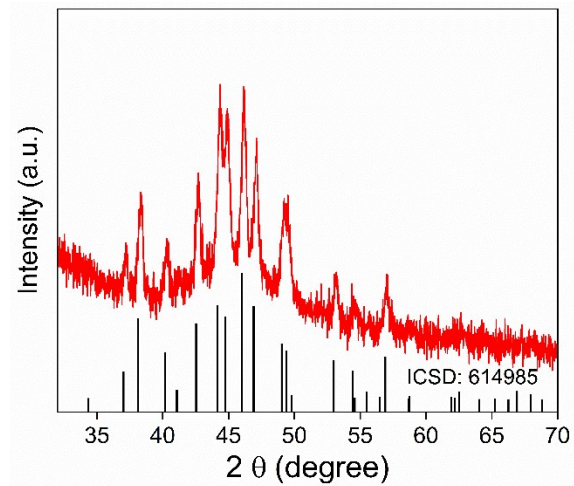

Figure S6. XRD pattern of Ni<sub>3</sub>B after photocatalytic CO<sub>2</sub> reduction reaction.

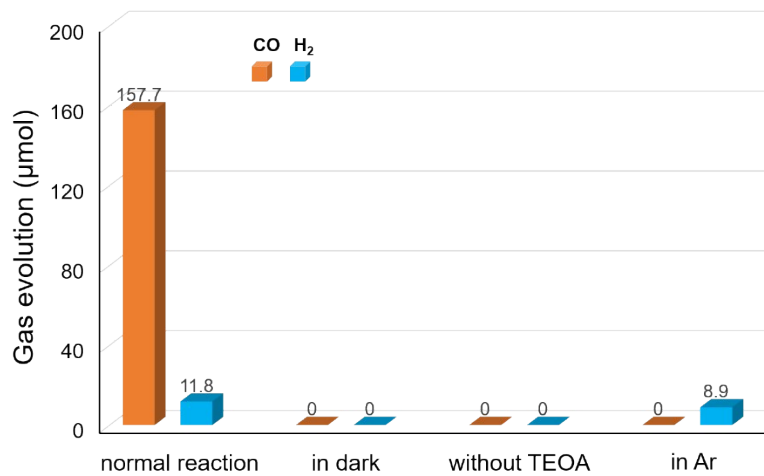

Figure S7. Production of CO and H<sub>2</sub> from the photocatalytic CO<sub>2</sub> reduction over Ni<sub>3</sub>B/[Ru] under various reaction conditions. The reaction time is 1 hour.

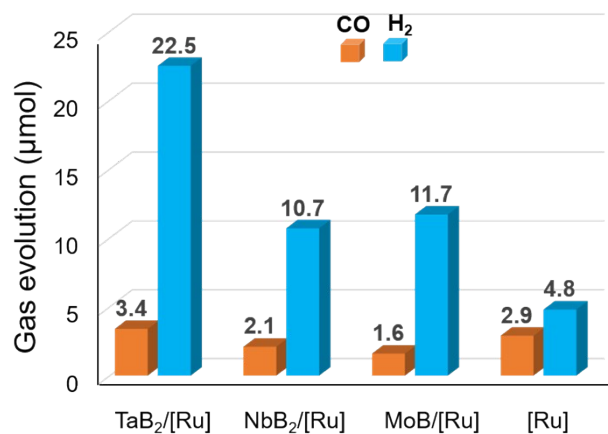

Figure S8. Production of CO and H<sub>2</sub> from the photocatalytic CO<sub>2</sub> reduction over TaB<sub>2</sub>, NbB<sub>2</sub> and MoB cocatalysts in the presence of [Ru].

Table S2. The calculated lattice parameters (Experimental results are in parenthesis, Unit Å) of Fe<sub>2</sub>B, Co<sub>3</sub>B and Ni<sub>3</sub>B, with lattice constants  $\alpha = \beta = \gamma = 90^\circ$ .

| Bulk              | Experiment |       |       | optimization |       |       |
|-------------------|------------|-------|-------|--------------|-------|-------|
|                   | a          | b     | c     | a            | b     | c     |
| Fe <sub>2</sub> B | 5.120      | 5.120 | 4.259 | 5.050        | 5.050 | 4.233 |
| Co <sub>3</sub> B | 5.221      | 6.631 | 4.408 | 5.145        | 6.609 | 4.396 |
| Ni <sub>3</sub> B | 5.211      | 6.619 | 4.389 | 5.197        | 6.629 | 4.390 |



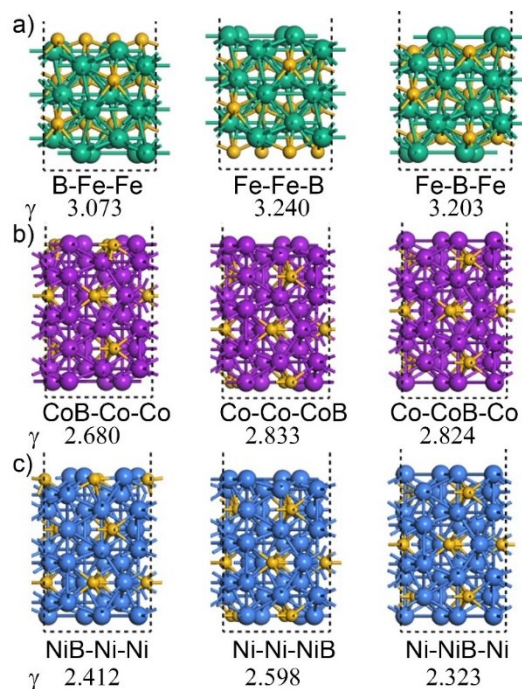

Figure S9. The three types and the corresponding surface energies  $\gamma$  (Unit: J/m<sup>2</sup>) of (a) Fe<sub>2</sub>B(010), (b) Co<sub>3</sub>B(010), and (c) Ni<sub>3</sub>B(010) surface. The green, purple, blue, and gold ball represents the Fe, Co, Ni, and B atom, respectively.

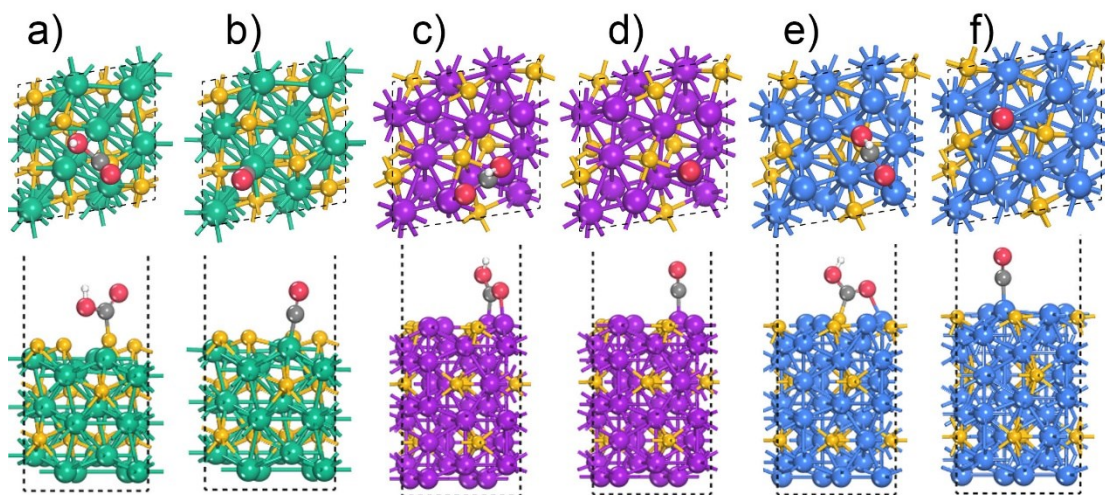

Figure S10. The intermediates of COOH and CO adsorbed on (a, b) Fe<sub>2</sub>B(010), (c, d) Co<sub>3</sub>B(010), and (e, f) Ni<sub>3</sub>B(010) surface. The green, purple, blue, gold, red, grey, and white ball represents the Fe, Co, Ni, B, O, C, and H atom, respectively.

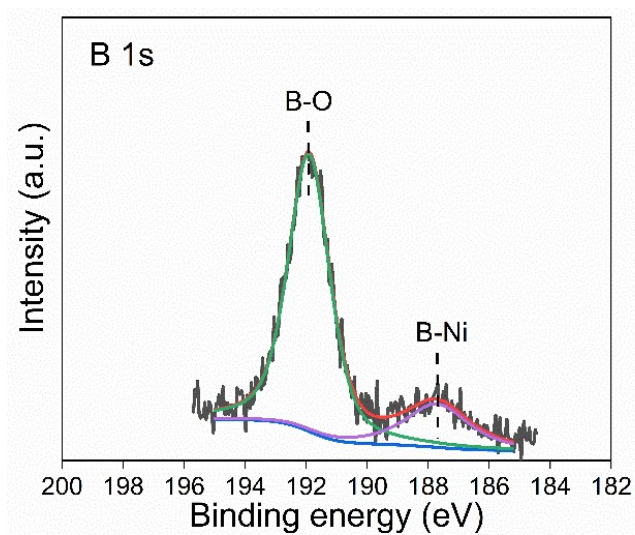

Figure S11. B 1s XPS spectrum of Ni<sub>3</sub>B.

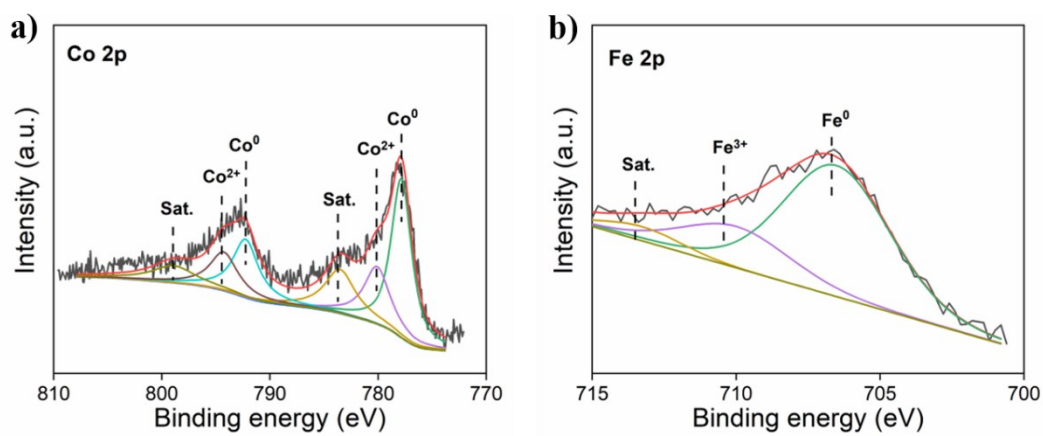

Figure S12. XPS spectra of (a) Co<sub>3</sub>B and (b) Fe<sub>2</sub>B.

Table S3. Fitted data of the time-resolved PL decay spectra.

| Sample                 | A1         | T1      | A2         | T2      | Average lifetime |
|------------------------|------------|---------|------------|---------|------------------|
| [Ru]                   | 2889.65142 | 0.38393 | 2916.48524 | 0.38394 | 0.38394          |
| Ni <sub>3</sub> B/[Ru] | 3766.4592  | 0.03645 | 6711.81536 | 0.50584 | 0.48760          |

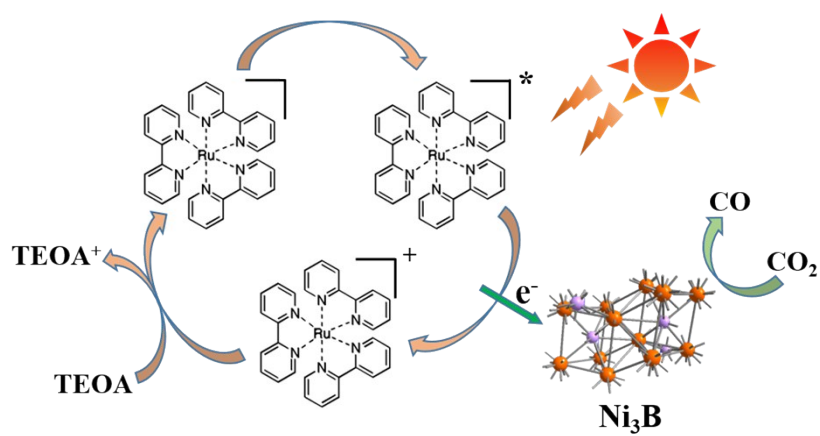

Figure S13. Proposed mechanism for the photocatalytic reduction of CO<sub>2</sub> to CO over [Ru] photosensitized Ni<sub>3</sub>B visible light irradiation

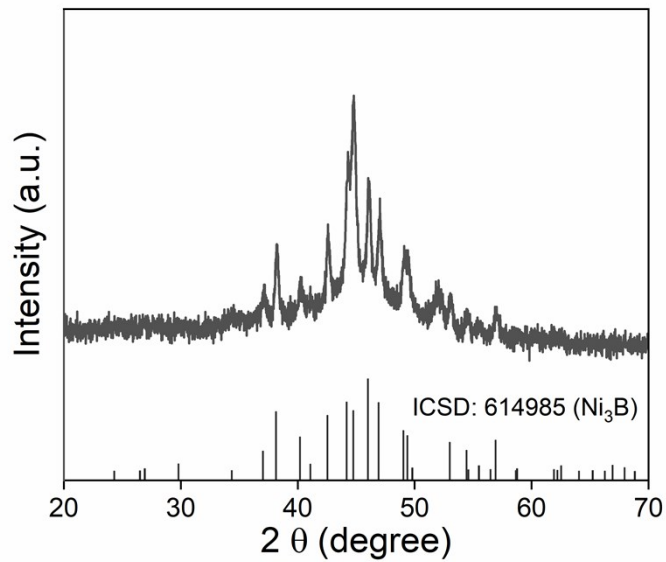

Figure S14. XRD patterns of air treated  $\text{Ni}_3\text{B}$ .

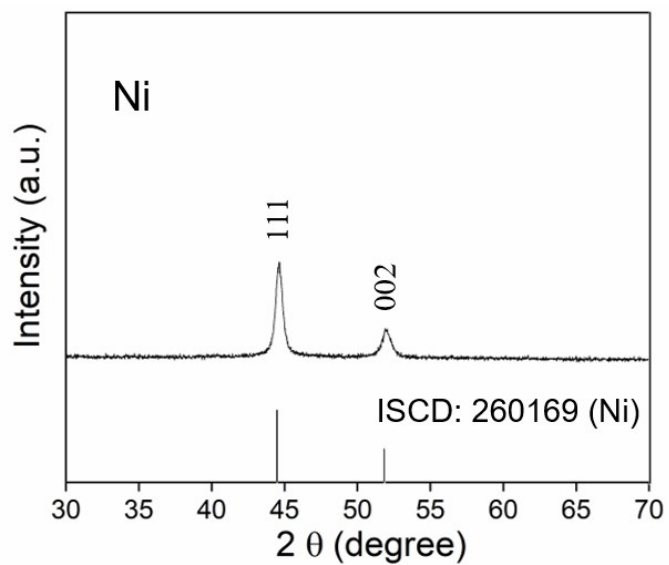

Figure S15. XRD patterns of  $\text{H}_2$  treated  $\text{Ni}_3\text{B}$ .

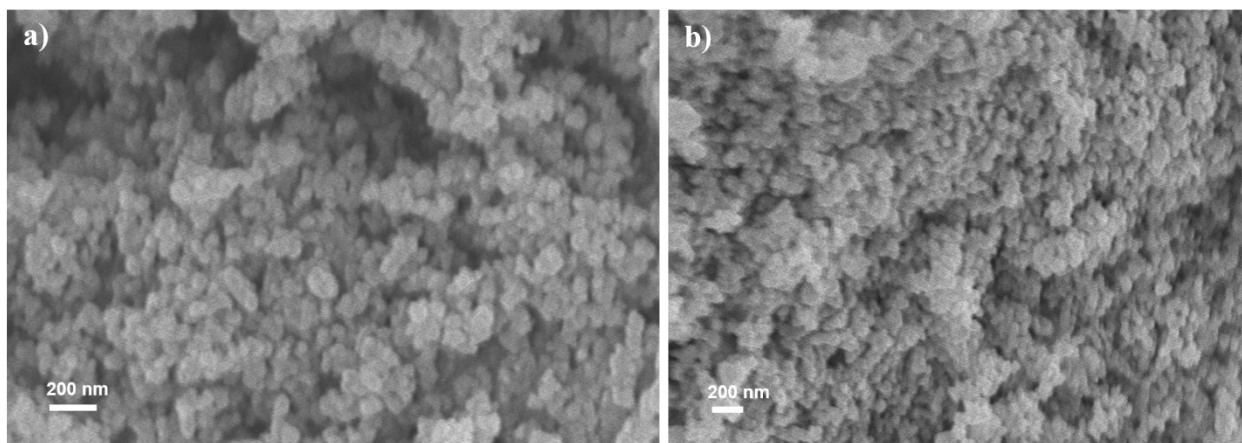

Figure S16. SEM images of (a) air treated Ni<sub>3</sub>B and (b) H<sub>2</sub> treated Ni<sub>3</sub>B.

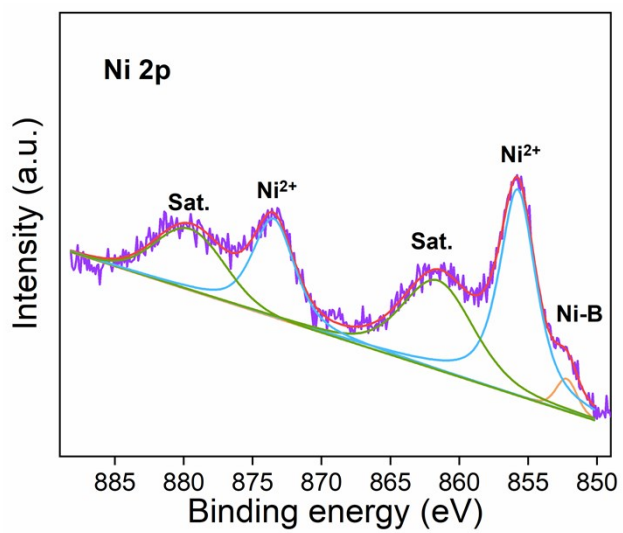

Figure S17. XPS spectra of air treated Ni<sub>3</sub>B.

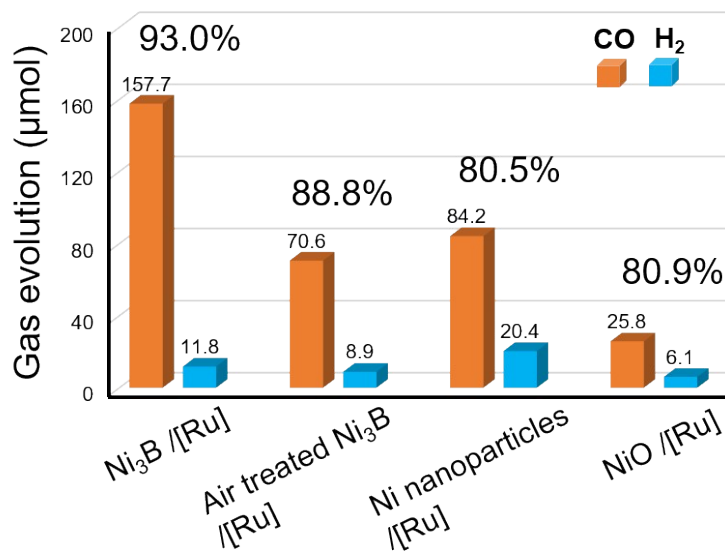

Figure S18. Photocatalytic CO<sub>2</sub> reduction performances of Ni<sub>3</sub>B, air treated Ni<sub>3</sub>B, Ni nanoparticles and NiO in the presence of [Ru]. The reactions are conducted for 1 hour. NiO was commercially obtained from Sigma-Aldrich.

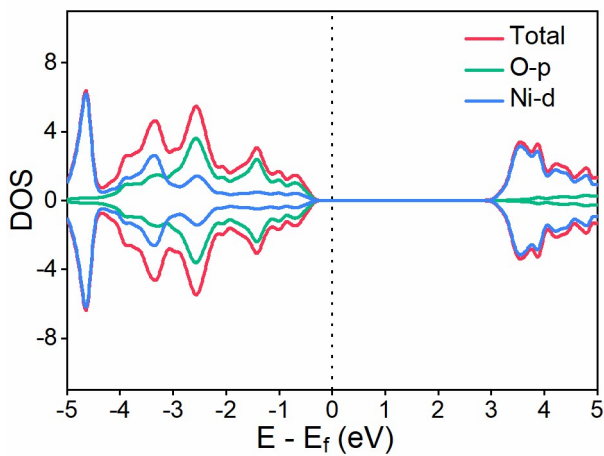

Figure S19. Calculated DOS of NiO. The DOS shows obvious bandgap in the NiO, indicating its semiconducting feature.



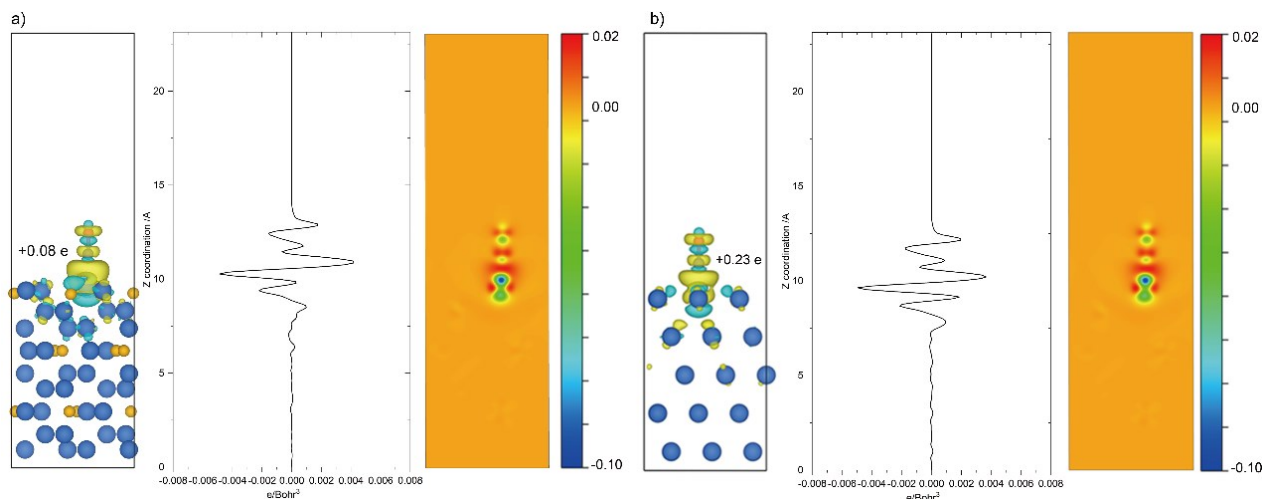

Figure S20. Charge density difference with 3D (left) and 2D (right) plot, and planar average differential charge density on the z-axis (middle) of (a) CO/Ni<sub>3</sub>B(010) system and (b) CO/Ni(111) system, with isosurfaces value of 0.002e/Bohr<sup>3</sup>, which CO is adsorbed on the top site. The cyan and yellow color corresponds to accumulation and depletion of charge, respectively. The corresponding charge transfer from surface to CO was marked from Bader charge analysis. The blue, gold red, and grey ball represents the Ni, B, O, and C atom, respectively.

## References

- [1] G. Kresse, J. Hafner, *Phys. Rev. B* **1993**, 47, 558-561.
- [2] G. Kresse, J. Furthmüller, *Phys. Rev. B* **1996**, 54, 11169-11186.
- [3] J. P. Perdew, K. Burke, M. Ernzerhof, *Phys. Rev. Lett.* **1996**, 77, 3865-3868.
- [4] P. E. Blöchl, *Phys. Rev. B* **1994**, 50, 17953-17979.
- [5] G. Kresse, D. Joubert, *Phys. Rev. B* **1999**, 59, 1758-1775.
- [6] P. Wang, S. N. Steinmann, G. Fu, C. Michel, P. Sautet, *ACS Catal.* **2017**, 7, 1955-1959.
- [7] C. Kapfenberger, B. Albert, R. Pöttgen, H. Huppertz, *Crystalline Materials*, **2006**, 221, 477-481.
- [8] R. M. A. Fruchart, *BULLETIN DE LA SOCIETE CHIMIQUE DE FRANCE* **1959**, 2, 422-423
- [9] S. Rundqvist, *Nature* **1958**, 181, 259-260.

- [10] V. Wang, N. Xu, VASPKIT: A pre-and post-processing program for the VASP code, 2013[J].
- [11] A. A. Peterson, F. Abild-Pedersen, F. Studt, J. Rossmeisl, J. K. Nørskov, *Energ. Environ. Sci.* **2010**, 3, 1311-1315.
- [12] V. I. Anisimov, J. Zaanen, O. K. Andersen, *Phys. Rev. B* **1991**, 44, 943-954.
